# Supplementary material
Source: ML conference proceedings conference paper supplement (https://openreview.net/forum?id=gn0mIhQGNM)

## Diffusion Model

## Unlearned DM

Traditional  
Unlearn

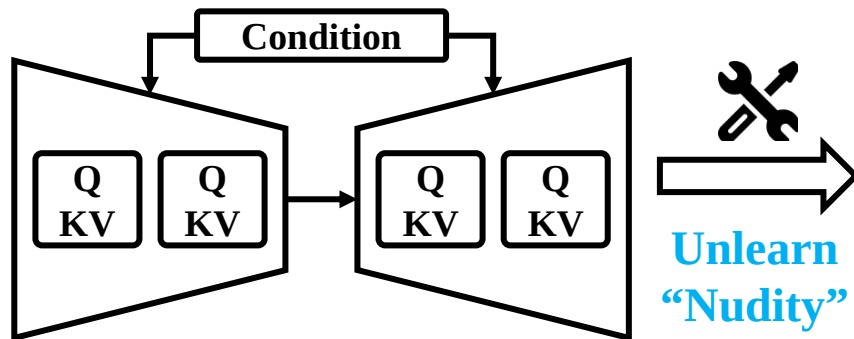

Unlearn  
"Nudity"

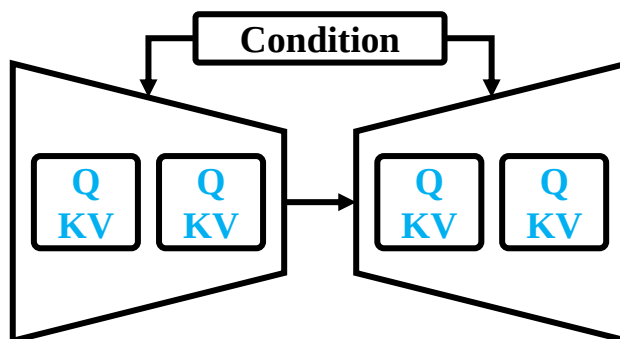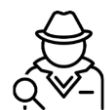

$$m_s = 1(|\nabla_{\theta} l_f(\theta_o; Df)| \geq \gamma)$$

Saliency  
Unlearn  
(SalUn)

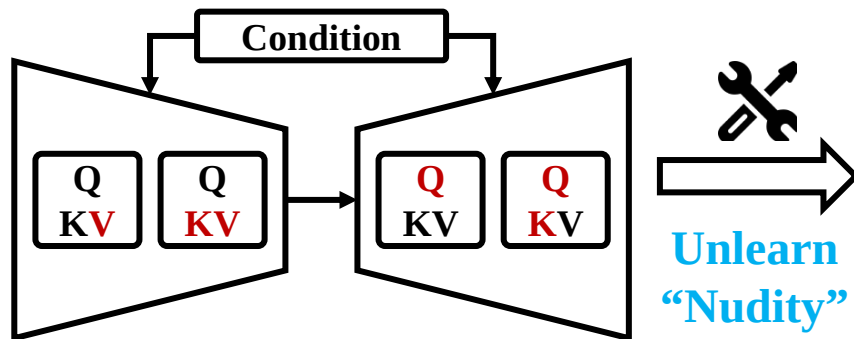

Unlearn  
"Nudity"

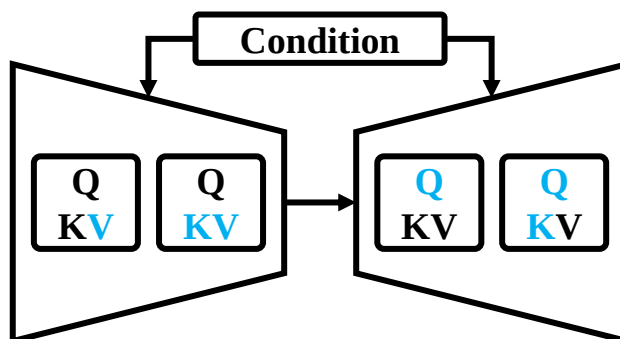

## Generated Images

Condition:  
"Nudity"

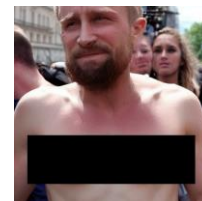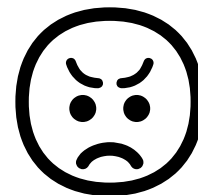

Condition:  
"Nudity"

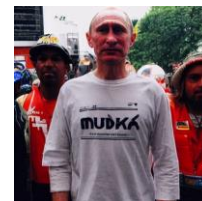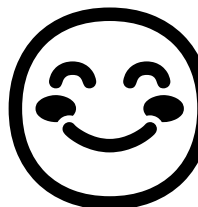

Supplement: supplementary_material [file attachment]
